# Supplementary material for: The Draft Genome of the Non-Host-Associated Methanobrevibacter arboriphilus Strain DH1 Encodes a Large Repertoire of Adhesin-Like Proteins
Source: PubMed Central journal article supplement (PMC5467289; doi:10.1155/2017/4097425), 2017-05-28
Supplement: 4097425.f1.pdf [file 4097425.f1.pdf]

Table S1. ANIm and aligned percentage

|                     | MMBAR.fas     | MBB_JCM13429.fna | JCM_03232017.fna | ANOR1.assembled.fna |
|---------------------|---------------|------------------|------------------|---------------------|
| MMBAR.fas           | *             | 99.59 [93.68]    | 99.59 [93.68]    | 93.25 [78.71]       |
| MBB_JCM13429.fna    | 99.59 [99.89] | *                | 100.00 [100.00]  | 93.39 [80.15]       |
| JCM_03232017.fna    | 99.59 [99.89] | 100.00 [100.00]  | *                | 93.39 [80.15]       |
| ANOR1.assembled.fna | 93.26 [85.26] | 93.40 [81.20]    | 93.40 [81.20]    | *                   |

Table S2: DDH-analysis of *Methanobrevibacter arboriphilus* strains

| Query genome                  | Reference genome               | Formula 1<br>DDH | Model C.I.     | Bootstrap C.I. | Distance | Prob. DDH >= 70% |
|-------------------------------|--------------------------------|------------------|----------------|----------------|----------|------------------|
| M. arboriphilus DH1, DSM 1125 | M. arboriphilus ANOR1          | 64.10            | [61 - 67.1%]   | 63.7 - 64.6%   | 0.3942   | 58.38            |
| M. arboriphilus DH1, DSM 1125 | M. arboriphilus DH1, JCM 13429 | 74.90            | [71.7 - 77.9%] | 72.8 - 77%     | 0.3088   | 85.36            |

Table S3. Genes encoding proteins involved in methanogenesis

| Locus_tag      | Protein name                                                 | EC Number    | gene name |
|----------------|--------------------------------------------------------------|--------------|-----------|
| MBBAR_3c01660  | formylmethanofuran dehydrogenase, subunit A                  | EC 1.2.99.5  | fwdA      |
| MBBAR_3c01650  | formylmethanofuran dehydrogenase, subunit B                  | EC 1.2.99.5  | fwdB      |
| MBBAR_3c01670  | formylmethanofuran dehydrogenase, subunit C                  | EC 1.2.99.5  | fwdC      |
| MBBAR_3c01640  | formylmethanofuran dehydrogenase, subunit D                  | EC 1.2.99.5  | fwdD      |
| MBBAR_3c01620  | formylmethanofuran dehydrogenase, subunit F                  | EC 1.2.99.5  | fwdF      |
| MBBAR_3c01630  | formylmethanofuran dehydrogenase, subunit G                  | EC 1.2.99.5  | fwdG      |
| MBBAR_3c01610  | formylmethanofuran dehydrogenase, subunit H                  | EC 1.2.99.5  | fwdH      |
| MBBAR_1c01730  | formylmethanofuran-tetrahydromethanopterin formyltransferase | EC 2.3.1.101 | ftt       |
| MBBAR_6c00310  | methenyltetrahydromethanopterin cyclohydrolase               | EC 3.5.4.27  | mch       |
| MBBAR_12c00400 | methylenetetrahydromethanopterin dehydrogenase               | EC 1.5.99.9  | mtd       |
| MBBAR_1c00020  | 5,10-methylenetetrahydromethanopterin reductase              | EC 1.5.98.2  | mer       |
| MBBAR_2c00380  | tetrahydromethanopterin S-methyltransferase, subunit A       | EC 2.1.1.86  | mtrA      |
| MBBAR_2c00390  | tetrahydromethanopterin S-methyltransferase, subunit B       | EC 2.1.1.86  | mtrB      |
| MBBAR_2c00400  | tetrahydromethanopterin S-methyltransferase, subunit C       | EC 2.1.1.86  | mtrC      |
| MBBAR_2c00410  | tetrahydromethanopterin S-methyltransferase, subunit D       | EC 2.1.1.86  | mtrD      |
| MBBAR_2c00420  | tetrahydromethanopterin S-methyltransferase, subunit E       | EC 2.1.1.86  | mtrE      |
| MBBAR_2c00370  | tetrahydromethanopterin S-methyltransferase, subunit F       | EC 2.1.1.86  | mtrF      |
| MBBAR_2c00360  | tetrahydromethanopterin S-methyltransferase, subunit G       | EC 2.1.1.86  | mtrG      |
| MBBAR_2c00350  | tetrahydromethanopterin S-methyltransferase, subunit H       | EC 2.1.1.86  | mtrH      |
| MBBAR_2c00430  | methyl-coenzyme M reductase, subunit alpha                   | EC 2.8.4.1   | mcrA      |
| MBBAR_2c00470  | methyl-coenzyme M reductase, subunit beta                    | EC 2.8.4.1   | mcrB      |
| MBBAR_2c00440  | methyl-coenzyme M reductase, subunit gamma                   | EC 2.8.4.1   | mcrG      |
| MBBAR_6c00020  | methanol:coenzyme M methyltransferase                        |              | mtaA      |
| MBBAR_6c00050  | methanol:coenzyme M methyltransferase                        |              | mtaB      |
| MBBAR_6c00040  | methanol:coenzyme M methyltransferase                        |              | mtaC      |
| MBBAR_6c00030  | methyltransferase activation protein, large subunit          |              | mapA      |
